# Supplementary material
Source: PubMed Central journal article supplement (PMC6330673)
Supplement: NIHMS1003193-supplement-Supplemental.pdf [file NIHMS1003193-supplement-Supplemental.pdf]

Sup.Table 1. Ferrets excluded from the immune response analysis in FER-16-09 trial

| Ferret # | LAIV virus | Post-LAIV |                |         |                                      | Challenge virus | Post-Challenge |               |         |                                        |
|----------|------------|-----------|----------------|---------|--------------------------------------|-----------------|----------------|---------------|---------|----------------------------------------|
|          |            | vRNA NFW  | Virus Spot NFW | Clinics | HAI serum titre to the vaccine stain |                 | vRNA NFW       | VirusSpot NFW | Clinics | HAI serum titre to the challenge virus |
| F3856    | SW 6:2     | neg       | neg            | -       | 5                                    | HK w/t          | neg            | neg           | -       | 5                                      |
| F3859    | TX 5:3     | neg       | neg            | -       | 5                                    | HK w/t          | neg            | neg           | -       | 5                                      |
| F3865    | Mock       | na        | na             | na      | 5                                    | HK w/t          | ct>30          | -             | -       | 5                                      |

Sup.Table 2. Ferrets with clinical signs of illness after LAIV inoculation in study FER-16-09

| Ferret # | Sex    | Chorulon Treatment | LAIV virus | Post-LAIV |               |                |                    |                                      | Challenge virus | Post-Challenge |               |                |                    |                                        |
|----------|--------|--------------------|------------|-----------|---------------|----------------|--------------------|--------------------------------------|-----------------|----------------|---------------|----------------|--------------------|----------------------------------------|
|          |        |                    |            | vRNA NFW  | VirusSpot NFW | weight loss, % | temp rises (>2 °C) | HAI serum titre to the vaccine stain |                 | vRNA NFW       | VirusSpot NFW | weight loss, % | temp rises (>2 °C) | HAI serum titre to the challenge virus |
| F3849    | Female | No                 | HK 6:2     | Pos       | Pos           | 3 %            | -                  | 640                                  | HK w/t          | Neg            | Neg           | 14 %           | -                  | 640                                    |
| F3857    | Female | No                 | SW 6:2     | Pos       | Pos           | 18 %           | On day 5           | 80                                   | HK w/t          | Neg            | Neg           | 8 %            | -                  | 80                                     |
| F3859    | Female | No                 | TX 5:3     | Neg       | Neg           | 4 %            | -                  | 5                                    | HK w/t          | Neg            | Neg           | 8 %            | -                  | 5                                      |

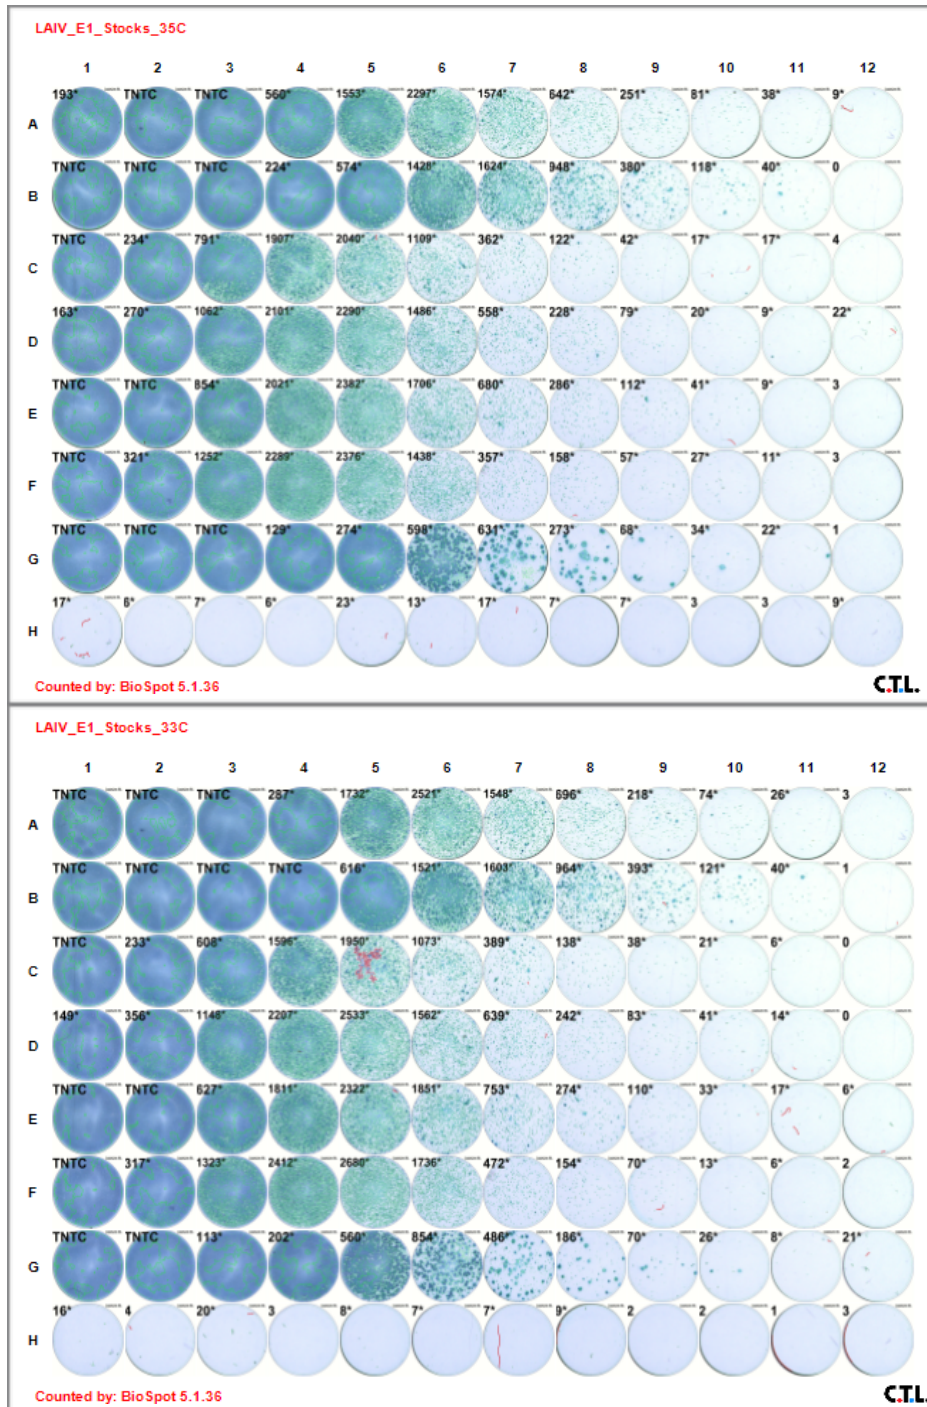

**Supplementary Figure 1.** Virospot analysis of viral stocks growing activity at 35°C (upper panel) and 33°C (lower panel). Each row represent virus stock half-log dilutions from -1 to -6 Log<sub>10</sub> (columns 1-11): A - TX LAIV 5:3, B - TX LAIV 6:2, C - SW LAIV 5:3, D - SW LAIV 6:2, E - HK LAIV 5:3, F - HK LAIV 6:2 and G - HK/14 (wild type virus).

### Ferret body weight changes

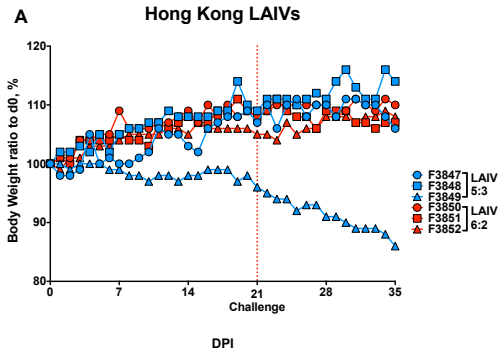

### Ferret body temperature changes

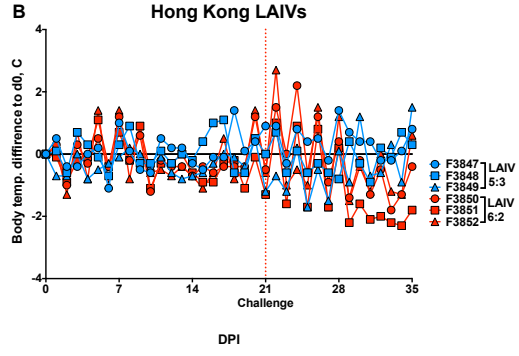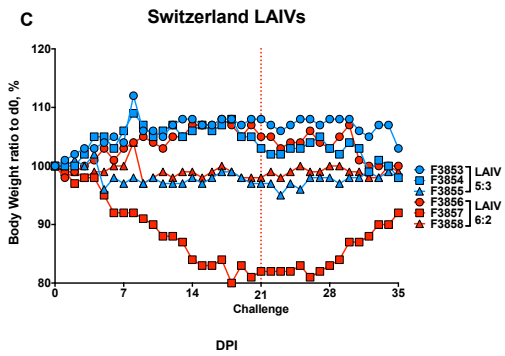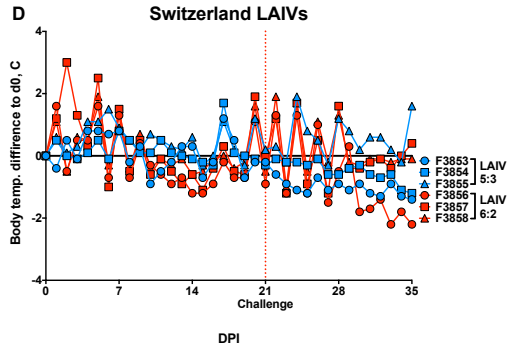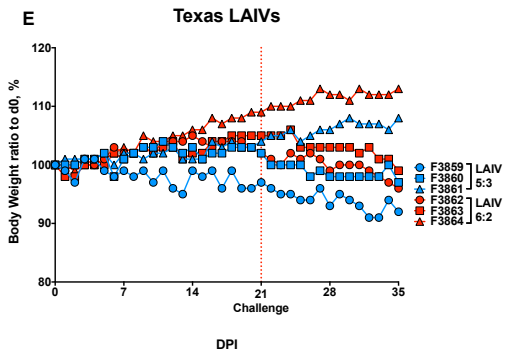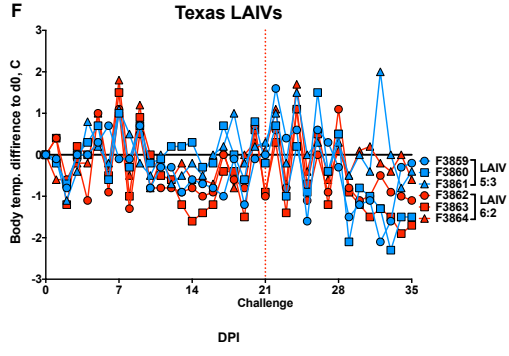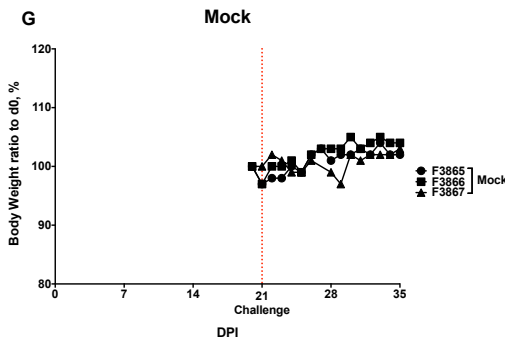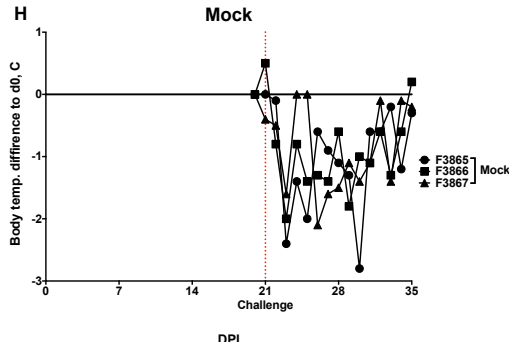

**Supplementary figure 2. Ferret body weight and temperature dynamics in experiment FER-16-09.** Animals received intranasally  $10^5$  EID<sub>50</sub>/500 uL of either LAIVs. 21 days after LAIV administration, animal were challenged with  $10^3$  TCID<sub>50</sub> in 500uL of A/Hong Kong/4801/2014 (H3N2) virus (vertical red dotted line). Body weight ratio and body temperature difference to 0 DPI were monitored daily for groups inoculated with HK LAIVs (A and B), SW LAIVs (C and D), TX LAIVs (E and F) and Mock-inoculated groups (G and H). LAIVs 5:3, LAIVs 6:2 and Mock data are visualized in blue, red and black colors respectively.

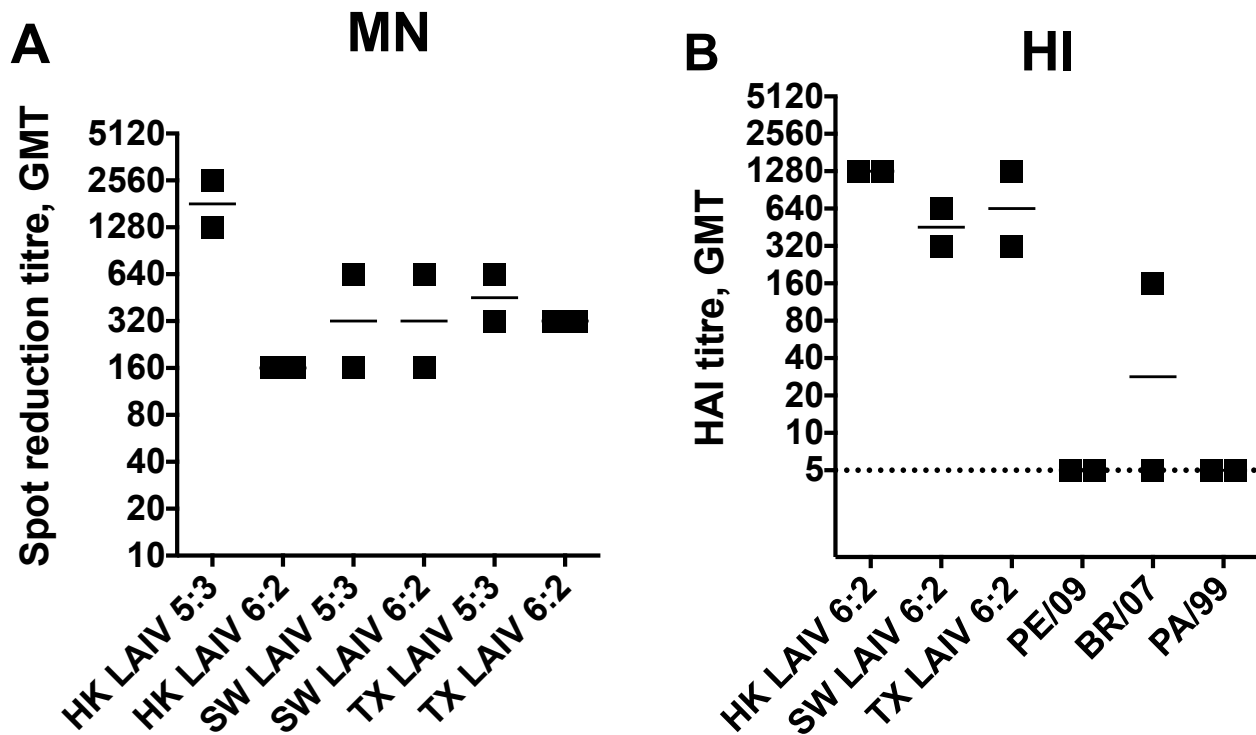

**Supplementary figure 3.** Virus-neutralizing (A) and HI antibody (B) titers in post-challenge serum samples from the Mock-immunized group in study FER-16-09. Mock-immunized ferrets were intranasally challenged with  $10^3$  TCID<sub>50</sub> in 500uL A/Hong Kong/4801/2014 (H3N2) virus. After 14 days of the challenge serum samples were collected. Serum samples from ferret F3865 (Mock) were excluded from analysis. All Pre-LAIVs serum samples (14 days before vaccination) were negative. Dotted line denotes assay limit of detection.

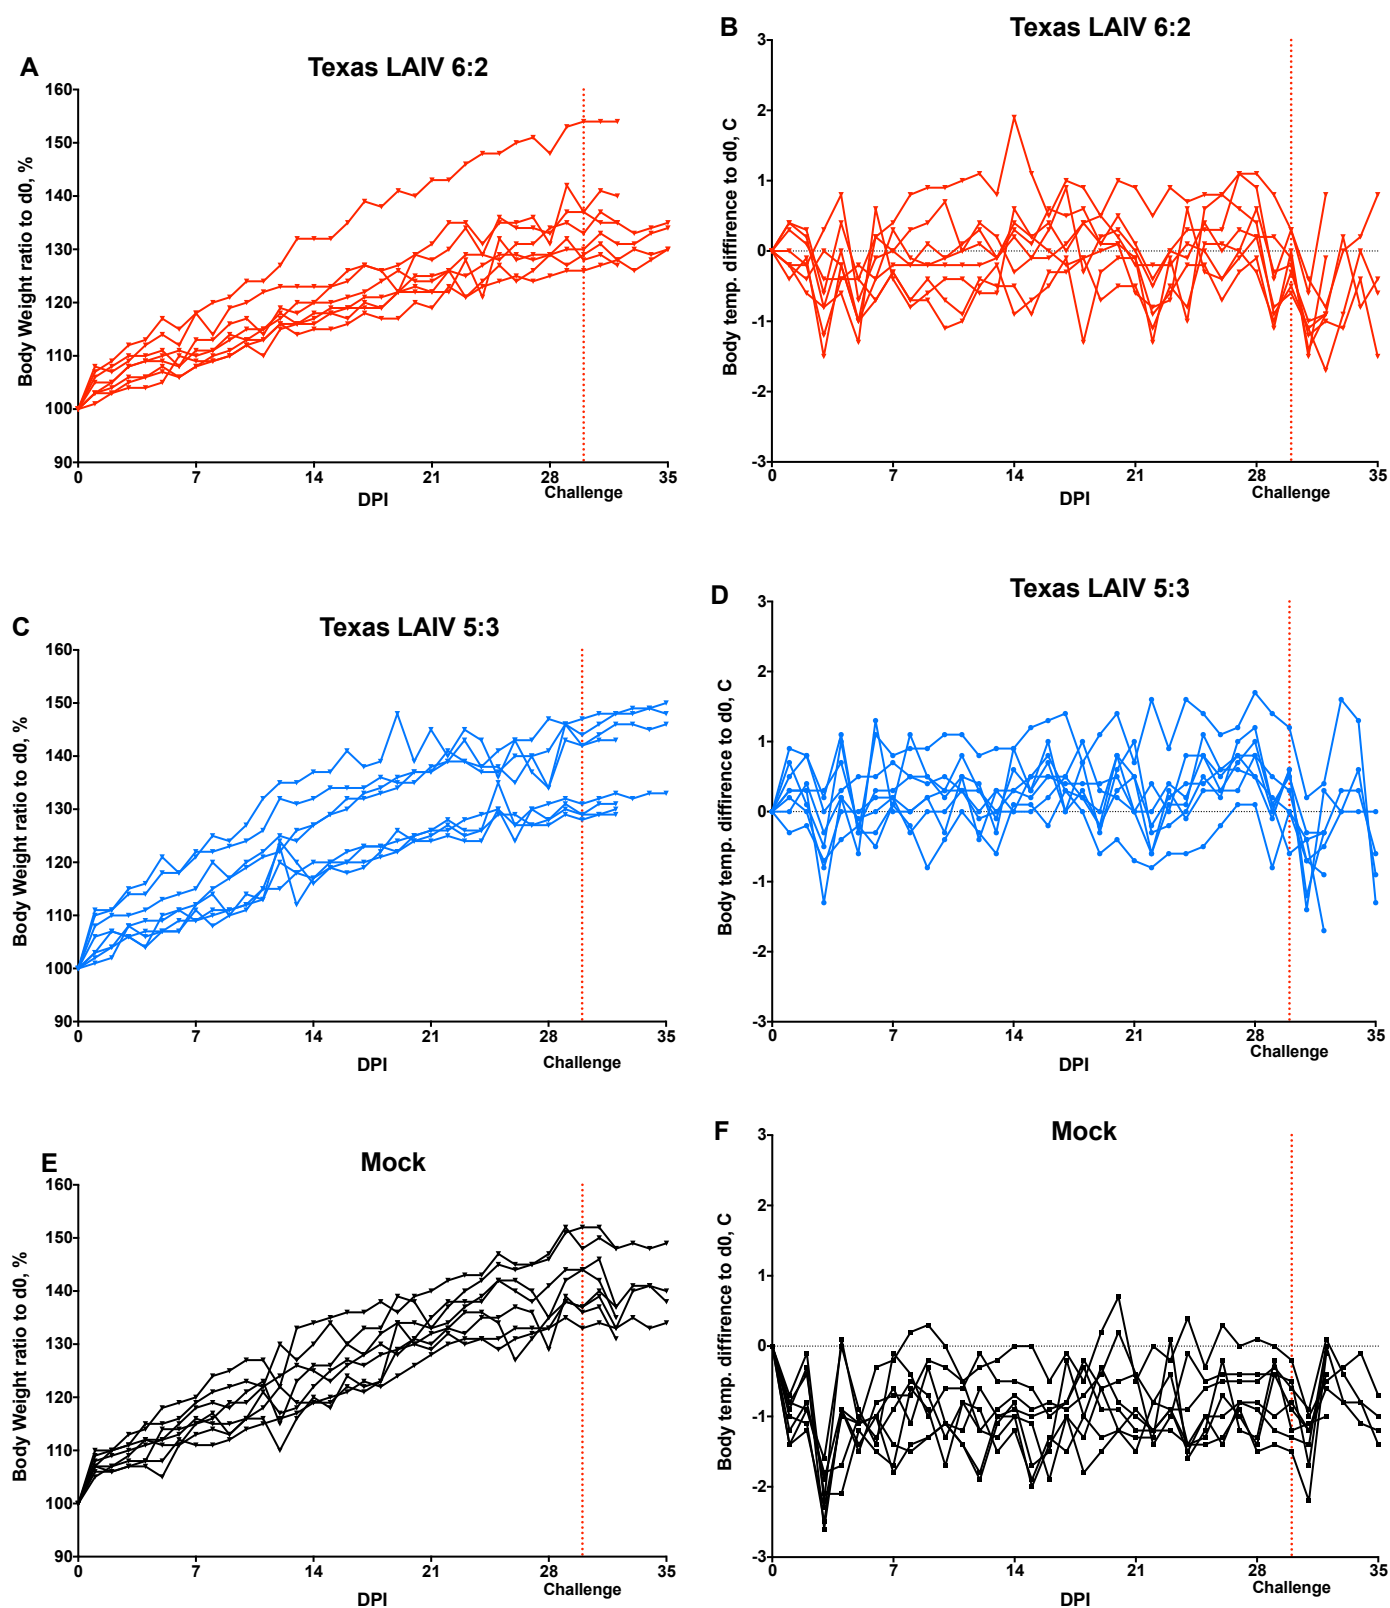

**Supplementary figure 4. Ferret body weight and temperature dynamics in study FER-17-01.** Four groups of 8 ferrets each were inoculated intranasally on day 0 with  $10^7$  EID<sub>50</sub> in 500 uL of TX LAIVs or Mock (PBS). After 30 days, A/Brisbane/10/2007 (H3N2) challenge virus was inoculated intranasally at dose  $10^7$  TCID<sub>50</sub> in 1000uL (vertical red dotted line). Body weight ratio and body temperature difference to 0 DPI were monitored daily for groups inoculated with TX LAIV 6:2 (A and B), TX LAIV 5:3 (C and D) and Mock inoculated groups (E and F).
